# Supplementary figures and images for: Integration of Transcriptomic and Proteomic Profiles Identifies Potential Biomarkers in Idiopathic Pulmonary Fibrosis
Source: Research Square preprint supplement (doi:10.21203/rs.3.rs-729282/v1), 2021-08-02

**A**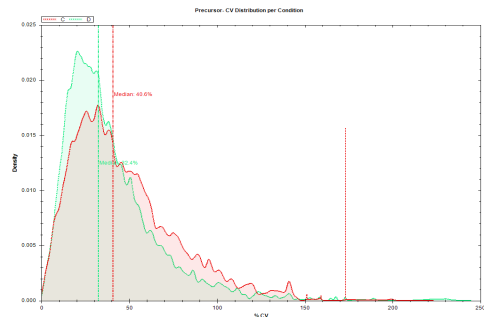**B**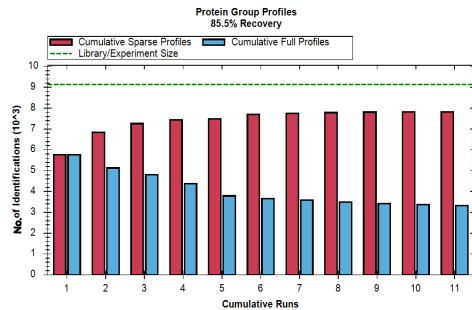**C**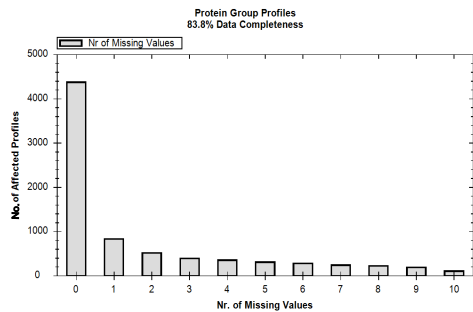**D**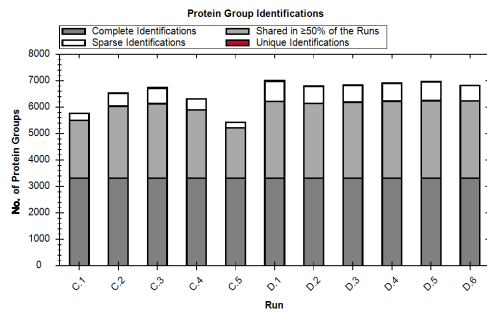**E**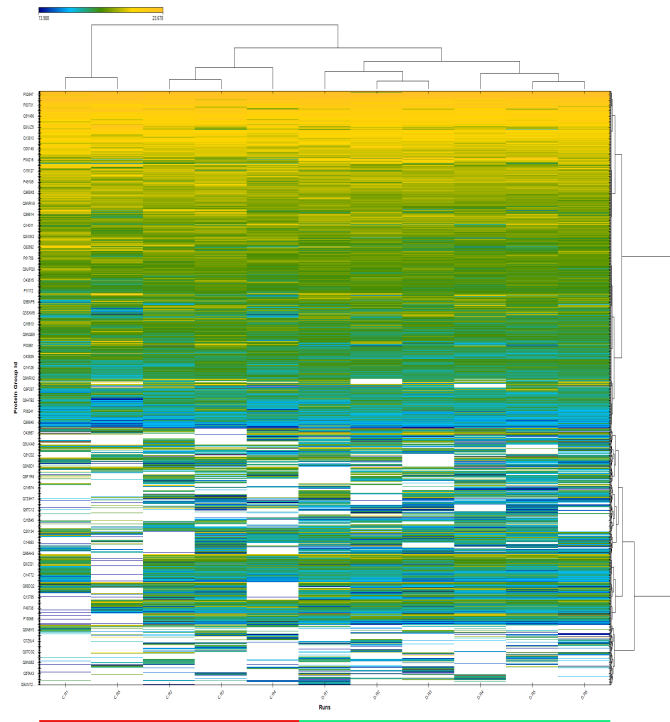

Supplement: Supplementary file 1 [file 14ca29f8e64b7707761254fe.pdf]
